# Supplementary material
Source: Research Square preprint supplement (doi:10.21203/rs.3.rs-9623523/v1)
Supplement: Supplementary file 1 [file 4bb479cf86ef1bd1020bbdb6.docx]

**Supplementary Information**

Supplementary Table 1 | SNP markers used for karyomapping analysis

| **Probe ID** | **Chr** | **Mother**  **(M)** | **Father**  **(F)** | **Reference**  **(R)** | **E1** | **E2** | **E3** | **E4** | **E5** | **E6** |
| --- | --- | --- | --- | --- | --- | --- | --- | --- | --- | --- |
| rs1800898 | 10 | AA | BA | BA | AA | AA | AA | AA | BA | BA |
| rs876670 | 10 | BB | AB | AB | BB | BB | BB | BB | AB | AB |
| rs11815022 | 10 | BB | AB | AB | BB | BB | BB | BB | AB | AB |
| rs7911849 | 10 | BB | AB | AB | BB | BB | BB | BB | AB | AB |
| rs912478 | 10 | AA | BA | BA | AA | AA | AA | AA | BA | BA |
| rs11190730 | 10 | BB | AB | AB | BB | BB | BB | BB | AB | AB |
| rs10786612 | 10 | AA | BA | BA | AA | AA | AA | AA | NC | BA |
| rs2863094 | 10 | BB | AB | AB | BB | BB | BB | BB | AB | AB |
| rs1056295 | 10 | AA | BA | BA | AA | AA | AA | AA | BA | BA |
| rs2295716 | 10 | AA | BA | BA | AA | AA | AA | AA | BA | BA |
| rs11190786 | 10 | AA | BA | BA | AA | AA | AA | AA | BA | BA |
| rs807023 | 10 | BB | AB | AB | AB | AB | NC | AB | AB | AB |
| rs17113735 | 10 | BB | AB | AB | BB | BB | BB | BB | AB | AB |
| rs11598564 | 10 | BB | AB | AB | BB | BB | BB | BB | AB | AB |
| rs11598177 | 10 | AA | BA | BA | AA | AA | AA | AA | BA | BA |
| rs625039 | 10 | BB | AB | AB | BB | BB | BB | BB | AB | AB |
| rs1885517 | 10 | BB | AB | AB | BB | BB | BB | BB | AB | AB |
| rs11190882 | 10 | BB | AB | AB | BB | BB | BB | BB | AB | AB |
| rs17113829 | 10 | BB | AB | AB | BB | BB | BB | BB | AB | AB |
| rs667707 | 10 | AA | BA | BA | AA | AA | AA | AA | BA | BA |
| rs633384 | 10 | AA | BA | BA | AA | AA | AA | AA | BA | BA |
| rs11591787 | 10 | AA | BA | BA | AA | AA | AA | AA | BA | BA |
| rs7091918 | 10 | AA | BA | BA | AA | AA | AA | AA | BA | BA |
| rs7916830 | 10 | AA | BA | BA | AA | AA | AA | AA | BA | BA |
| rs7090670 | 10 | AA | BA | BA | AA | AA | AA | AA | BA | BA |
| rs10450405 | 10 | AA | BA | BA | AA | AA | AA | AA | BA | BA |
| rs4919549 | 10 | BB | AB | AB | BB | BB | BB | BB | AB | AB |
